TITLE:

Inferring the role of habitat dynamics in driving diversification: evidence for a species pump  
in Lake Tanganyika cichlids

AUTHORS: Thijs Janzen<sup>1,2,3\*</sup>, Rampal S. Etienne<sup>2</sup>

AUTHOR AFFILIATION

1. Max Planck Institute for Evolutionary Biology, Department of Evolutionary Theory,  
August-Thienemann-Straße 2, 24306, Plön, Germany.

2. University of Groningen, Groningen Institute for Evolutionary Life Sciences, Box  
11103, 9700 CC Groningen, The Netherlands

3. Carl von Ossietzky University of Oldenburg, Institute for Biology, Department of  
Molecular Ecology, Carl-von-Ossietzky Straße 9, 26111, Oldenburg, Germany

4. \*Corresponding author: Thijs Janzen, Carl von Ossietzky University of Oldenburg,  
Institute for Biology, Department of Molecular Ecology, Carl-von-Ossietzky Straße 9,  
26111, Oldenburg, Germany  
e-mail: [thijs.janzen@uni-oldenburg.de](mailto:thijs.janzen@uni-oldenburg.de)

## ABSTRACT

Geographic isolation that drives speciation is often assumed to slowly increase over time, for instance through the formation of rivers, the formation of mountains or the movement of tectonic plates. Cyclic changes in connectivity between areas may occur with the advancement and retraction of glaciers, with water level fluctuations in seas between islands or in lakes that have an uneven bathymetry. These habitat dynamics may act as a driver of allopatric speciation and propel local diversity. Here we present a parsimonious model of the interaction between cyclical (but not necessarily periodic) changes in the environment and speciation, and provide an ABC-SMC method to infer the rates of allopatric and sympatric speciation from a phylogenetic tree. We apply our approach to the posterior sample of an updated phylogeny of the *Lamprologini*, a tribe of cichlid fish from Lake Tanganyika where such cyclic changes in water level have occurred. We find that water level changes play a crucial role in driving diversity in Lake Tanganyika. We note that if we apply our analysis to the Most Credible Consensus (MCC) tree, we do not find evidence for water level changes influencing diversity in the *Lamprologini*, suggesting that the MCC tree is a misleading representation of the true species tree. Furthermore, we note that the signature of habitat dynamics is found in the posterior sample despite the fact that this sample was constructed using a species tree prior that ignores habitat dynamics. However, in other cases this species tree prior might erase this signature. Hence we argue that in order to improve inference of the effect of habitat dynamics on biodiversity, phylogenetic reconstruction methods should include tree priors that explicitly take into account such dynamics.

## INTRODUCTION

Environmental changes such as the formation of mountain ridges, the formation of rivers and the movement of tectonic plates have long been known to be important drivers of speciation (Coyne and Orr 2004). Repeated environmental changes may thus lead to diversification patterns. Cyclic changes in the environment can cause populations to continuously switch between an allopatric and sympatric stage, providing a continuously renewed potential for speciation. And these cyclic changes can in turn drive diversity towards levels unexpected given the current geography, sometimes referred to as a “species pump” (Heaney 1985; Rossiter 1995). Examples of species pumps include environmental fluctuations fragmenting habitats on the slopes of mountains (Weir 2006; Sedano and Burns 2010; Hutter et al. 2013), glaciations and postglacial secondary contacts (Barnosky 2005), sea level changes causing the fusion and fragmentation of islands (Glor et al. 2004; Thorpe et al. 2008, but see Papadopoulou and Knowles 2015), and fluctuations in water level causing fragmentation and fusion of lakes with uneven bathymetry, as in the African Rift Lakes (Cohen et al. 1997b; Alin et al. 1999; McGlue et al. 2008; Ivory et al. 2016).

The African Rift Lakes provide a good starting point in studying the interplay between cyclic habitat dynamics and speciation, because they have been subject to frequent water level changes (Cohen et al. 1997b; Alin and Cohen 2003; Ivory et al. 2016), and are well known for their tremendous biodiversity (Seehausen 2000, 2006; Turner et al. 2001; Wagner et al. 2012, 2014; Brawand et al. 2014). An estimated number of 2000 cichlid fish species (Turner et al. 2001) have evolved in the African Rift Lakes over the past 10 million years (Genner et al. 2007; Meyer et al. 2016), and comprise one of the most spectacular adaptive radiations

(Seehausen 2006). The most prominent water level changes took place in Lake Tanganyika, where the water level has dropped substantially on multiple occasions over the past million years, sometimes splitting the lake into multiple smaller lakes (Lezzar et al. 1996; Cohen et al. 1997a, 2007). Being the oldest lake of the three large rift lakes (Cohen et al. 1993), Lake Tanganyika contains the highest behavioral diversity (Konings 2007) and is the only lake with a highly resolved phylogeny for cichlid fish. Evidence for the influence of changing water levels comes from analysis of mitochondrial DNA, which shows that for *Tropheus* species, some populations have experienced secondary contact upon changes in water level, potentially increasing genetic diversity and driving speciation (Sturmbauer et al. 2001; Koblmüller et al. 2011; Sefc et al. 2017). Similar patterns were found for *Variabilichromis moorii* and *Ophthalmotilapia nasuta* (Sturmbauer et al. 2001), *Telmatochromis temporalis* (Winkelmann et al. 2016), and *Altolamprologus* (Koblmüller et al. 2016). Comparison of mitochondrial DNA between populations from deep and shallow areas emphasizes that the deep areas are habitats that are more persistent over time, with lower genetic variation (Nevado et al. 2013). Furthermore, *Eretmodus* lineages identified using mitochondrial DNA are strongly associated with the bathymetric basins of Lake Tanganyika (Verheyen et al. 1996), suggesting that they have independently diversified at low water level.

Aguilée et al. (2013) developed a model for the African Rift Lakes in which populations at different locations diverge from each other depending on the local habitat, and at the same time allowed for sympatric speciation by implementing assortative mating that allows for a single branching point in trait values. Over time the different locations become separated or are reconnected, and this may drive the formation of new species. The authors conclude that stable numbers of diversity are best obtained by a fragmented habitat with recurrent merged states and rapid fluctuations. However, Aguilée et al. (2013) do not compare their results to

empirical data. By contrast, Pigot et al (2010) used a spatially explicit model of landscape fragmentation, where consecutive splitting of species' geographic ranges drives speciation, and compared phylogenies generated with their model, with known bird phylogenies. They found that including this geographical context of speciation explains a large part of the features exhibited by the reconstructed avian trees. Hence, including a geographical context of speciation seems a promising research avenue.

Here, we provide a method to infer whether or how cyclic changes in the environment influence both the generation and the maintenance of biodiversity. We use an extension of the standard constant-rates birth-death model. Because deriving an expression for the likelihood of this model for a given set of phylogenetic branching times is difficult, but simulation of phylogenies under the model is easy, we used approximate Bayesian computation (ABC) based on sequential Monte Carlo sampling (SMC) to estimate parameters from phylogenies. We applied our approach to an updated phylogeny of the *Lamprologini*, a tribe of cichlid fish from Lake Tanganyika in order to assess the importance of these habitat dynamics in shaping the current biodiversity of cichlids in Lake Tanganyika.

## 110    **METHODS**

### 111    *Model*

112    To model the interaction between environmental change and speciation, we envisage a lake  
 113    that consists of a single pocket at high water level, but that splits into two pockets when the  
 114    water level drops. When the water level drops, we assume that all species distribute  
 115    themselves equally over the two pockets; similarly, when the water level rises, all species  
 116    previously contained in the two pockets are combined into the single pocket. Allopatric  
 117    speciation can only occur when the water level is low. We assume a constant probability rate  
 118    for allopatric speciation, and hence the waiting time until the next speciation event is  
 119    exponentially distributed. After this waiting time, one of the two incipient species in either  
 120    pocket can speciate into a new species. If this allopatric speciation does not occur before the  
 121    water level rises again, i.e. reflecting that there has not been enough genetic divergence, the  
 122    two incipient species in the two pockets merge back into one species. This is conceptually  
 123    similar to the idea of protracted speciation (Etienne and Rosindell 2012): the water level drop  
 124    initiates the speciation process whereas the allopatric speciation event is the completion of  
 125    speciation under the protracted speciation model. Sympatric speciation can always occur in  
 126    our model, either at high water level in the lake, or in both pockets when the water level is  
 127    low. Extinction is considered to be a background process that occurs locally, i.e. within a  
 128    pocket. If the water level is high, this causes extinction of a species, if the water level is low,  
 129    this causes local extinction in one of the pockets.

130    We implemented our model using a Gillespie algorithm, where the time steps are chosen  
 131    depending on the rate of possible events. In the model there are five possible events:

- 132        1) A water level change event, inducing incipient species or merger of incipient species.
- 133        2) Sympatric speciation event at high water level, with rate  $\lambda_s^h$

3) Sympatric speciation event at low water level, with rate  $\lambda_s^l$

4) Allopatric speciation(-completion) event, at low water level, with rate  $\lambda_a^l$

5) Extinction event, with rate  $\mu$

When the water level drops, all species distribute themselves over both pockets. Thus, immediately after a water level drop, the number of incipient species is equal to twice the number of species. When the water level rises, all incipient species that belong to the same species merge into a single species. During a sympatric speciation event, a single species splits into two new species, and the original (incipient) species is consumed in the process. Here we assume that local disruptive selection causes divergence, similar to the implementation of speciation by Aguilée (Aguilée et al. 2011, 2013). If sympatric speciation occurs when the water level is low, the species in the other pocket is retained, and thus three new lineages arise: the first branching point occurs at the water level drop while the second occurs at the sympatric speciation event (Figure 1).

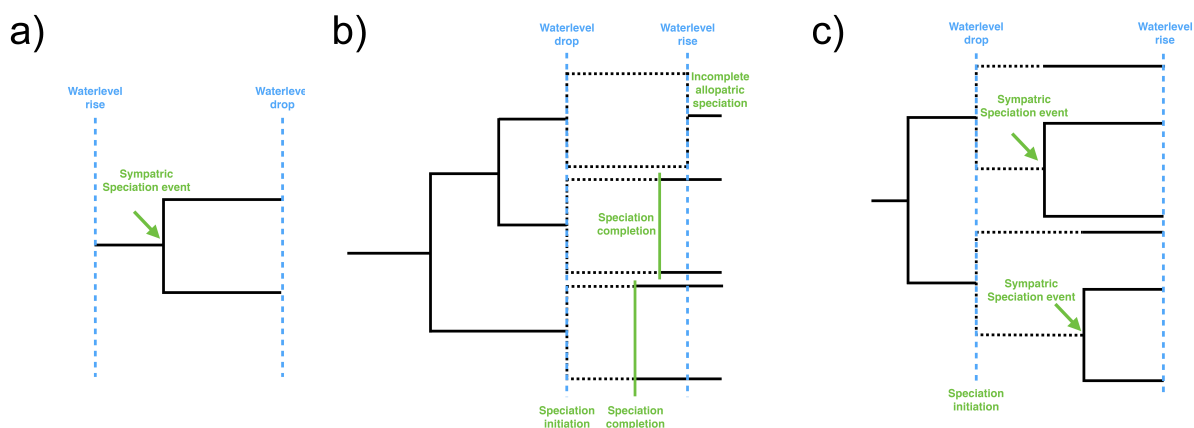

Figure 1. Schematic representation of the consequences of the three different types of speciation. Time proceeds from left to right. The dotted blue lines indicate water level changes. (a) During a sympatric speciation at high water level event, diversification is not aligned with any associated water level change. (b) During allopatric speciation at low water level, speciation initiation (incipient species are indicated with a dotted line) coincides with the water level drop, causing branching events (if speciation-completion occurs before water level rise) to line up in time. Branching events are conditionally independent of the time of speciation completion, hence, even when the actual speciation completion events occur at different time points, branching events in the species tree are identical. (c) During a sympatric

speciation event at low water, the speciation event is independent of the water level changes. Because the original species is consumed in the process, a new branching event is also added at the water level change event. Hence, both speciation-completion (b) and sympatric speciation at low water level (c) cause branching times to line up at the time of water level drop. Please note that (a) and (c) represent the reconstructed species tree, but (b) does not; the reconstructed species tree for (b) would not show the branching event in the uppermost part of the tree.

During an extinction event, one (possibly incipient) species is removed from the simulation. If the water level is low, this need not lead to the extinction of a species, because the sister incipient species might remain in the other pocket, ensuring survival of the species.

### *Maximum Likelihood*

Without water level changes, our model reduces to the constant rates birth-death model (Nee et al. 1994). As a reference therefore, we estimated parameters of the standard birth-death model using Maximum Likelihood. The likelihood of the birth-death model was calculated using the function “bd\_ML” from the R package DDD. (Etienne et al. 2012).

### **Fitting the model to empirical data**

We performed two different fitting procedures: firstly, we performed a model selection procedure, where three different water level scenarios were fitted simultaneously to the data (more information about the chosen scenarios can be found in the next section). The model selection procedure simultaneously estimates parameter estimates and assesses the fit of the models. However, because the model selection procedure primarily samples the best fitting model (by design), it does not allow for the comparison of parameter estimates across different models. Therefore, we also fitted the three different water level scenarios independently to the empirical data, and obtained posterior distributions for the parameters relevant to these scenarios.



We fitted our model to 100 trees randomly sampled from the MCMC chain obtained from the \*BEAST analysis (see below), and to the Most Credible Consensus (MCC) tree.

### *Water level scenarios*

The main focus of our approach is to assess the impact of water level changes on the diversification rate. Lake Tanganyika experienced low water level stands 35 - 40 k years ago (kya) (-160 meter), 169 - 193 kya (-250 meter), 262 - 295 kya (-350 meter) , 363 - 393 kya (-350 meter) and 550 - 1100 kya (-650 – 700 meter) (Lezzar et al. 1996; Cohen et al. 1997a). The southern and northern basin of Lake Tanganyika are separated from each other by a ridge at a depth of 500 meter below present level. Although some of these water level changes may not have split up the lake completely, we assume here that these water level changes still caused sufficient disruption of migration between the northern and southern basin, to be equivalent to physical separation. Consequently, high water levels occurred between 0 – 35 kya, 40 – 169 kya, 193 – 262 kya, 295 - 363 kya and 393 – 550 kya. Unfortunately the geological record does not reveal whether any low water level stands occurred beyond 1.1 million years ago (Ma). This leaves us with two alternative scenarios: either no low water level stands occurred beyond 1.1 Ma, or these low water level stands have not been preserved accurately in the geological record.

In order to capture these two scenarios we performed inference using two alternative water level implementations. Firstly we used the exact literature values, assuming a high water level stand until 1.1 Ma. We refer to this scenario as LW (Literature Waterlevels). Secondly we assumed that before 1.1. Ma, water level changes occurred at the same *average* rate of water level change in the most recent 1.1 million years. In the recent 1.1 million years, the lake experienced 5 high water level stands, and 5 low water level stands, which amounts to 10 water level changes in total. To extrapolate water level changes to more than 1.1 Ma, we

drew waiting times until the next water level change from an exponential distribution with rate 10. We refer to this scenario as EW (Extrapolated Water levels). Thirdly we also tested the null expectation: no effect of water level changes on speciation, we refer to this scenario as NW (No Water levels). Without water level changes, the model reduces to the constant-rates birth death model.

## *Parameter estimation*

To fit the model to empirical data we used Approximate Bayesian Computation, in combination with a Sequential Monte Carlo scheme (ABC-SMC) (Toni et al. 2009). As summary statistics for the ABC analysis we chose the normalized Lineages Through Time statistic (Janzen et al. 2015), tree size, Phylogenetic Diversity (AvPD, Schweiger et al. 2008) and the  $\gamma$  statistic (Pybus and Harvey 2000). On all parameters ( $\lambda_s^h$ ,  $\lambda_s^l$ ,  $\lambda_a^l$ ,  $\mu$ ) we chose uniform priors  $U(-3, 2)$ , on a  $^{10}\log$  scale, such that the eventual prior distribution spans ( $10^{-3}$ ,  $10^2$ ). A  $^{10}\log$  scale was chosen to explore parameter space uniformly, and put extra emphasis on low values. The standard deviation of the normal distribution used to perturb the parameters was chosen to have a mean of 0, and a standard deviation of 0.05 (on the  $^{10}\log$  transformed parameter), and we updated one parameter each time (e.g. jumps were only made in one dimension, to avoid extremely low acceptance rates). The number of particles used per SMC step was 10,000, where a particle is a data structure containing the model choice and the parameter estimates. To assess the fit of the model to the data we calculated the Euclidian distance between the summary statistic of the simulated data and the empirical data. To ensure that the differences in summary statistics were on the same scale, we normalized the differences. Differences were normalized by dividing each difference by the standard deviation of that summary statistic of 1,000,000 trees simulated using parameter values sampled from the prior.

## 232 *Model selection*

233 To identify which model best explains the data, we performed ABC model selection, as  
 234 described in Toni et al. (2009; 2010). The main difference between standard ABC-SMC and  
 235 ABC-SMC including model selection is that the latter adds one parameter, which keeps track  
 236 of the model. As jumping kernel between models we assumed a 50% probability of staying at  
 237 the same model, and a 25% probability of jumping to either other model. We assumed a  
 238 uniform prior across all three models; this translates to a probability of 1/3 for each model in  
 239 the first iteration of the ABC-SMC procedure, and hence an expected number of 3333  
 240 particles assigned to each model in the first iteration. This reversible jump ABC-SMC model  
 241 selection procedure results in a posterior distribution over the three models, where the model  
 242 with most support is the model selected most across all particles. We can calculate the Bayes  
 243 factor by taking the ratio of the number of particles assigned to the respective models (Toni et  
 244 al. 2009). For example, the Bayes factor of LW/EW is the number of particles assigned to the  
 245 model with literature water level changes divided by the number of particles assigned to the  
 246 model with extrapolated water level changes. Because a model can receive zero particles, we  
 247 set the Bayes factor for each model compared to the model with zero particles to the  
 248 maximum support possible, which is the total number of particles: 10,000. To calculate the  
 249 posterior support for a model, we calculate  $2 \ln(\text{Bayes factor})$ , following Kass and Raftery  
 250 (1995). A transformed Bayes factor over a value of 2 then corresponds to substantial support  
 251 for the considered model (Kass and Raftery 1995).

## 252 *Model selection validation*

253 To assess whether our ABC-SMC method can accurately infer the correct model, we  
 254 simulated 100 datasets for each model (NW, LW & EW), with parameter values drawn from  
 255 the prior. We report the median Bayes factor across the 100 replicates. If our method can

accurately infer the correct model, we expect the median Bayes Factor (after 2 ln transformation) to be above 2 when comparing posterior support for the model with which the data was simulated to the other two models.

# *Measurement uncertainty*

A phylogeny generated with a high rate of allopatric speciation and a high rate of water level changes tends to have multiple speciation events that are aligned in time (Figure 1, b). This is due to the fact that the onset of speciation is given by the time of water level change. Phylogenetic reconstruction methods such as BEAST (Bouckaert et al. 2014) currently do not allow for simultaneous branching events. Hence, when fitting the model, trees are generated that are by definition dissimilar from the empirical tree constructed using BEAST, even if underlying events are close to the original events. To circumvent this we perturbed the branching time of each node in the trees simulated using our model. In this way speciation events that were previously aligned in time now occur on slightly different time points, as in a tree from a BEAST analysis. We perturbed branching times by adding a random number drawn from a truncated normal distribution with mean 0, standard deviation  $\sigma$ , truncated by the minimum distance to either the daughter or the parent species. If there were no daughter lineages present, and the node gave rise to an extant species, the normal distribution was truncated to the minimum distance to the parent or the present time. Nodes were perturbed from past to present (leaving the crown in place, to ensure a phylogenetic tree with the same age as the empirical tree). The standard deviation of the perturbation kernel was included as an extra parameter to be inferred, with a uniform prior on  $(10^{-3}, 10^0)$ .

## 279 *Empirical data*

280 We fitted our model to the phylogenetic tree of the tribe of *Lamprologini*, the most diverse  
 281 tribe within Lake Tanganyika, containing 79 species of cichlids in Lake Tanganyika (Day et  
 282 al. 2007; Koblmüller et al. 2007; Sturmbauer et al. 2010). The *Lamprologini* are endemic to  
 283 Lake Tanganyika and its surrounding rivers and all species are substrate brooders with shared  
 284 paternal and maternal care. In contrast to the mouthbrooding species from the  
 285 *Haplochromini*, the *Lamprologini* show little sexual dimorphism and dichromatism, which  
 286 are well-known indicators for sexual selection (Kraaijeveld et al. 2011). We therefore expect  
 287 that the *Lamprologini* is a good candidate for picking up signals from water level changes.

288 We reconstructed a new *Lamprologini* tree following the workflow of the most complete  
 289 *Lamprologini* tree to date, which is a consensus tree based on the mitochondrial ND2 gene  
 290 (Sturmbauer et al. 2010), but we added three newly described species (*Lepidiolamprologus*  
 291 *mimicus* (Schelly et al. 2007), *Neolamprologus timidus* (Kullander et al. 2014b) and  
 292 *Chalinochromis cyanophleps* (Kullander et al. 2014a)). Using phyloGenerator (Pearse and  
 293 Purvis 2013), we downloaded sequences from GenBank for nine genes (GenBank access  
 294 numbers can be found in the Supplementary Information). Genes were selected on the basis  
 295 of species coverage (at least 25% of the 79 *Lamprologini* species for which molecular data is  
 296 available), and whether or not the gene was crucial for inclusion of a species (e.g. for a  
 297 number of species, the only available gene was ND2). After selection, our full dataset  
 298 consisted of three mitochondrial genes: the NADH dehydrogenase subunit 2 (ND2 gene,  
 299 sequences from Kocher et al. 1995; Klett and Meyer 2002; Clabaut et al. 2005; Duftner et al.  
 300 2005; Schelly et al. 2006; Day et al. 2007; Koblmüller et al. 2007, 2016; Schwarzer et al.  
 301 2009; Wagner et al. 2009; Sturmbauer et al. 2010; O’Quin et al. 2010; Kullander et al. 2014b;  
 302 Weiss et al. 2015). The cytochrome b (cytb) gene (sequences from Salzburger et al. 2002;  
 303 Nevado et al. 2009; Wagner et al. 2009; O’Quin et al. 2010; Matschiner et al. 2011, 2016;

Kullander et al. 2014b; Shirai et al. 2014) and the cytochrome c oxidase subunit I (COI gene, sequences from Sparks and Smith 2004; Nevado et al. 2013; Kullander et al. 2014a, 2014b; Breman et al. 2016; Matschiner et al. 2016) and six nuclear genes: the nuclear locus 38A (38A, sequences from Muschick et al. 2012; Meyer et al. 2016), the 18S ribosomal RNA internal-transcribed spacer 1–2 with 5.8S and 28S ribosomal RNA partial sequences (18S, sequences from Nevado et al. 2009; Koblmüller et al. 2016), the recombinase activating protein 1 (rag1, sequences from Clabaut et al. 2005; Nevado et al. 2009; Kullander et al. 2014b; Shirai et al. 2014; Koblmüller et al. 2016; Meyer et al. 2016), the endothelin receptor B1 gene (ednrb1, sequences from Muschick et al. 2012; Santos et al. 2014), the ribosomal protein S7 (rps7, sequences from Schelly et al. 2006; Meyer et al. 2016)) gene and the rod opsin gene (RH1, sequences from Sugawara et al. 2002; Spady et al. 2005; Nagai et al. 2011; Meyer et al. 2015). GenBank access numbers for the used sequences can be found in the supplementary material.

Sequences were aligned using MAFFT (setting: --auto) (Katoh and Standley 2013), and subsequently, sequences were cleaned using trimAI (sites with >80% data missing were removed, e.g. setting -gt 0.2) (Capella-Gutiérrez et al. 2009). Rather than concatenating the alignments, we partitioned the data into subsets with independent sequence evolution models, which is more suitable for a dataset which is expected to show incomplete lineage sorting or hybridization (Meyer et al. 2016). To prepare alignments for use with partitionFinder, alignments were combined using SequenceMatrix 1.8 (Vaidya et al. 2011). The best partitioning found by partitionFinder 2.1.1 (Lanfear et al. 2012, 2016), partitioned the data into 5 subsets (unlinked branches, AICc selection criterion), with all nuclear genes into one subset (Rps7, ednrb1, 38A, 18S, RAG1 and RH1), with substitution model HKY+I+Γ. The remaining three mitochondrial genes (ND2, COI and cytb) were placed in separate subsets, each with a GTR+I+ Γ substitution model.

Using \*BEAST (Heled and Drummond 2010) within the BEAST 2 package (Bouckaert et al. 2014), we inferred the time-calibrated species tree. We used an uncorrelated log-normal relaxed clock and applied two calibration points. Firstly, we calibrated the crown of the Lamprologini to be 4 million years old (log-normal prior, mean of 4 Myr 95% conf interval: [3, 5]), based on the results from Meyer et al. (2016). Secondly, we included two riverine Lamprologini species (*L. congoensis* and *L. teugelsi*), and calibrated the onset of their branching event at 1.7 Ma (offset 1.1, log normal distribution with mean 1.7, 95% conf interval [1.15, 3.47], “use originate = true”), following Koblmueller (2010). We applied 1/X priors on the clock rates, and log-normal priors on the substitution rates. All other priors were left at their default setting. As tree model we used the birth death model. The used BEAST configuration file (the Beauti xml) can be found in the supplementary material.

We ran 10 independent STARBEAST MCMC chains, of 750M trees each. Each chain was verified to have ESS values of at least 100 for all parameters. The first 10M trees were pruned from these chains as burn-in and then they were combined (we used the species tree, rather than the individual gene trees) into one large chain (of 7400M trees). Chains were thinned by taking only each 5,000<sup>th</sup> tree. Using TreeAnnotator (from the BEAST 2 suite) we constructed a Maximum Clade Credibility tree (using all 1.48M trees after thinning), storing the mean heights.

We then pruned the tree from riverine species to obtain the pure *Lamprologini* tree on which we fitted our model. Instead of performing one ABC-SMC inference on the obtained MCC tree using a huge number of particles, which would be more accurate but computationally extremely demanding, we performed 100 parallel inferences using 10,000 particles each. We report the mean Bayes factor across these replicates.

### 353 *Branching time uncertainty in the empirical tree*

354 To account for uncertainty in the estimates of branching times in the *Lamprologini* tree we  
 355 sampled 100 trees from the posterior distribution obtained by \*BEAST. Sampling was  
 356 performed at random, irrespective of the likelihood of the trees. In the Supplementary  
 357 material we show that the distribution of summary statistics of the subset of 100 trees is  
 358 similar to the distribution of the thinned chain. The 100 sampled trees were, like the  
 359 Maximum Clade Credibility tree, also pruned to remove the riverine taxa and stored  
 360 separately. For all 100 trees we performed both the ABC-SMC model selection algorithm and  
 361 the ABC-SMC parameter estimation algorithm, to determine the impact of different  
 362 branching times on the inferred water level model and associated parameters, and to  
 363 determine whether the MCC tree is a good representation of the underlying variability.



## RESULTS

### **Lamprologini phylogeny**

The onset of diversification within the *Lamprologini* is estimated to be around 3.96 Ma (95% Highest Posterior Density interval (HPD): [3.09, 4.91]), which is very close to the prior we put on the node age, based on previous estimates (Meyer et al. 2016). Furthermore, we estimate the branching off of the Congo species (*N. congoensis* and *N. teugelsi*) from the *Lamprologini* in Lake Tanganyika to have occurred around 1.35 Ma (HPD: [1.12, 1.68]), which is a bit younger than previously obtained estimates (1.70 Ma, (Sturmbauer et al. 2010)). The topology of the Maximum Clade Credibility tree is largely consistent with previous findings (Sturmbauer et al. 2010) (Figure 1). Placement of *Neolamprologus fasciatus* as a close relative to *N. wauthioni* seems to re-iterate previously published evidence for introgressive hybridization (Koblmüller et al. 2007). For the three species not previously included in the *Lamprologini* phylogeny, *Lepidiolamprologus mimicus* was placed as a close relative to the other species within the genus *Lepidiolamprologus*, *Chalinochromis cyanophleps* was placed as a sister species to *Chalinochromis brichardi*, within the group of *Chalinochromis* and *Julidochromis* species, and in agreement with previous analysis (Kullander et al. 2014b). In contrast to previous findings (Kullander et al. 2014b), *Neolamprologus timidus* is not placed as a sister species to *Neolamprologus furcifer*, but rather associates with *N. mondabu* and *N. falcicula*. Again, in contrast to other previous findings (Gante et al. 2016), we place *N. olivaceous* outside the *brichardi* complex, which includes the model system species *N. brichardi* and *N. pulcher*. (but see the DensiTree representation, which shows that this is not true for all trees). Interestingly, we also do not infer *N. savoryi* to be phylogenetically clustered within the *brichardi* complex (the ‘Princess cichlids’ (Gante et al. 2016)), in contrast to Gante *et al.* (2016). We should take into account

however that the analysis by Gante *et al.* is based on on full genome sequences from only a small group of species, in contrast to the limited number of markers from a large number of species that we used.

As a reference we inferred speciation and extinction using the constant-rates birth-death model (Nee et al. 1994). Using Maximum Likelihood (the function `bd_ML` in the `DDD` package (Etienne et al. 2012)), we obtained an estimate of  $1.871 \text{ myr}^{-1}$  for the speciation rate, and an estimate of  $0.993 \text{ myr}^{-1}$  for the extinction rate, for the MCC tree. We find an estimate of  $0.87 \text{ myr}^{-1}$  for the diversification rate (speciation - extinction) and an estimate of  $0.531 \text{ myr}^{-1}$  for the turnover rate (extinction / speciation). For the 100 trees sampled from the full chain, we obtain estimates of  $3.02 \text{ myr}^{-1}$  (95% HPD: [1.608, 4.947]) for the speciation rate and  $2.409 \text{ myr}^{-1}$  (95% HPD: [0.884, 4.530]) for the extinction rate. This translates into estimates of  $0.61 \text{ myr}^{-1}$  (95% HPD: [0.313, 0.985]) for the diversification rate, and  $0.765 \text{ myr}^{-1}$  (95% HPD: [0.518, 0.930]) for the turnover rate. Estimates for the birth-death model obtained during reconstruction of the tree using BEAST indicate an estimate of  $0.864 \text{ myr}^{-1}$  (95% HPD: [0.287, 1.459]) for the speciation rate and an estimate of  $0.613 \text{ myr}^{-1}$  (95% HPD: [0.181, 0.953]) for the relative death rate, which translates into an estimate for the extinction rate of  $0.52 \text{ myr}^{-1}$  (95% HPD: [0.156, 0.823]) per million years. This yields estimates of  $0.334 \text{ myr}^{-1}$  and  $0.613 \text{ myr}^{-1}$  for the diversification and turnover rate respectively. The BEAST inferences include the riverine species, so speciation and extinction rates are expected to be a bit different.

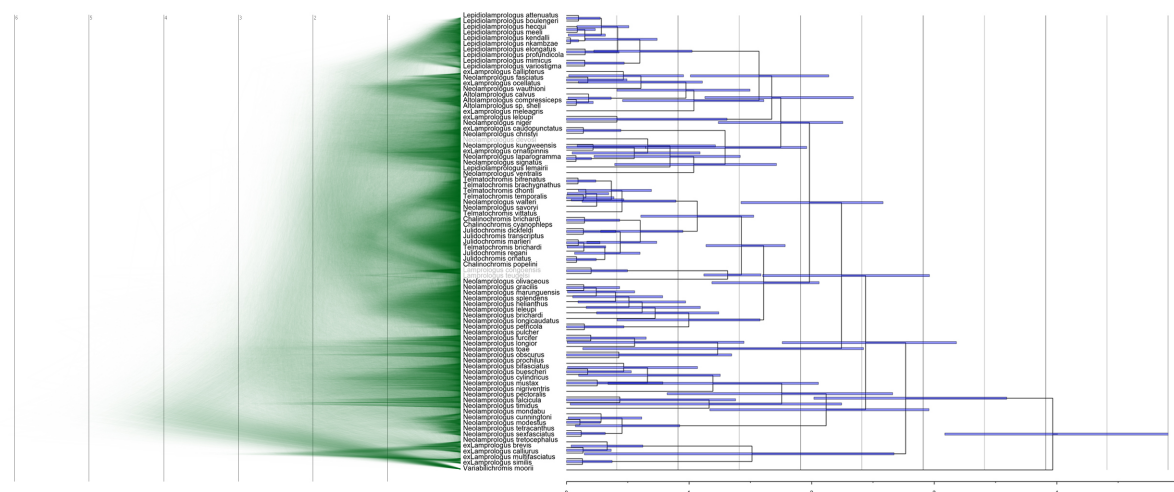

409

410 Figure 2. Phylogenetic hypothesis for the *Lamprologini* and outgroups, based on 3  
 411 mitochondrial and 6 nuclear genes, and two calibrations: 4 million years for the root of the  
 412 *Lamprologini* clade, and 1.1 - 3.5 million years for the Congo *Lamprologini* species. Left  
 413 panel: DensiTree (Bouckaert and Heled 2014) representation of the MCMC chain obtained  
 414 using \*BEAST. Shown are trees from a thinned posterior chain, after selecting every  
 415 100,000<sup>th</sup> tree. Riverine species are indicated in grey. Right panel: Maximum Clade  
 416 Credibility tree. Bars around the node span the 95% HPD for each node. Please note that for  
 417 the dual display of both the densitree representation and the MCC phylogeny, some tips of  
 418 the MCC phylogeny might appear slightly misaligned. A high resolution version of both the  
 419 Densitree representation and the MCC phylogeny can be found in the supplementary  
 420 information.

421

## 422 Parameter estimation

423 We estimated parameter values for the three models for all 100 trees sampled from the  
 424 posterior. We report the parameter values across the combined posterior across all 100 trees.  
 425 Note that variation in the parameter estimates results from two sources of variation:  
 426 branching time variation across the 100 trees, and secondly variation in the parameter  
 427 estimate within each ABC-SMC inference.

428 The model without water level changes is identical to the constant-rates birth-death model,  
 429 and we find that our ABC-SMC estimates for sympatric speciation at high water level ( $\lambda_s^h$ )  
 430 are slightly lower than the Maximum Likelihood estimate of the birth rate under the constant  
 431 rates birth-death model (2.644 Myr<sup>-1</sup>(95% HPD: [1.208, 4.633], see also Table 1) versus 3.02,

see also Table 1). Similarly, we infer the extinction rate ( $\mu$ ) to also be slightly lower (1.950 Myr<sup>-1</sup> (95% HPD: [0.188, 4.101]) versus 2.409, see also Table 1). We obtain estimates of 0.694 and 0.738 for diversification and turnover respectively, which are close to the estimates obtained using Maximum Likelihood (a diversification rate of 0.610 and a turnover rate of 0.765 respectively). Taking into account the 95% confidence intervals on the obtained parameter estimates and the fact that the ABC-SMC estimates are potentially affected by the prior while the ML estimates are not, we are confident that estimates obtained using our ABC-SMC method for the model without water level changes are consistent with the maximum likelihood estimates under the constant-rates birth-death model.

Using the LW model, which implements water level changes following the literature (e.g. high water level until ~1.1 Ma, after which a series of water level changes took place), we infer a lower rate of sympatric speciation at high water level (0.871 Myr<sup>-1</sup> (95% HPD: [0.227, 3.642])), which is compensated with a high rate of allopatric speciation (6.412 Myr<sup>-1</sup> (95% HPD: [0.001, 14.195])) but not with a high rate of sympatric speciation at low water level (0.028 Myr<sup>-1</sup> (95% HPD: [0.001, 0.651])), suggesting that water level dynamics are important drivers of biodiversity, but only through allopatric speciation. Extinction is inferred to be low (0.037 Myr<sup>-1</sup> (95% HPD: [0.001, 2.133])). Because of the non-trivial relationship between speciation at high and low water level, we can no longer calculate diversification and turnover rates.

Using the EW model, where water level changes are extrapolated beyond 1.1 Ma, we observe that the rate of sympatric speciation at high water level is inferred to be similar to without water level changes (2.753 Myr<sup>-1</sup> (95% HPD: [1.347, 4.383])). Extinction, however, is lower (0.111 Myr<sup>-1</sup> (95% HPD: [0.001, 1.627])), and allopatric speciation and sympatric speciation at low water level are both inferred to be much lower than for the literature water scenario

(0.022 Myr<sup>-1</sup> (95% HPD: [0.001, 0.466]) and 0.033 Myr<sup>-1</sup> (95% HPD: [0.001, 0.504]) respectively).

Across the three water level models we observe that the distribution of the post-hoc perturbations  $\sigma$  does not differ substantially from the prior for the NW and EW water models, with low estimates (0.036 (95% HPD: [0.001, 0.569]) and 0.030 (95% HPD: [0.001, 0.484]) for the NW and EW model respectively, Table 1). We notice a much higher value of  $\sigma$  associated with LW (0.174, (95% HPD: [0.001, 0.680])), which also has a much higher estimate for allopatric speciation at low water level. Allopatric speciation at low water level potentially causes temporal alignment of branching times and we introduced the parameter  $\sigma$  to correct simulated phylogenies for this, to allow comparison with phylogenies generated by \*BEAST, which does not allow for temporally aligned branching times. Hence, the higher inferred value of  $\sigma$  for the LW model confirms the validity of the application of our post-hoc perturbation.

Table 1. Median posterior density estimate, for sympatric speciation at high water ( $\lambda_s^h$ ), extinction ( $\mu$ ), perturbation ( $\sigma$ ), sympatric speciation at low water ( $\lambda_s^l$ ) and allopatric speciation ( $\lambda_a^l$ ). Shown are results for the model with no water level changes (NW), literature values for water level changes (LW) and water level changes extrapolated beyond the literature range (EW). The 95% credibility interval is shown between square brackets. All values are rates per million years.

|    | $\lambda_s^h$        | $\mu$                | $\sigma$             | $\lambda_a^l$         | $\lambda_s^l$        |
|----|----------------------|----------------------|----------------------|-----------------------|----------------------|
| NW | 2.644 [1.208, 4.633] | 1.950 [0.188, 4.101] | 0.036 [0.001, 0.569] |                       |                      |
| LW | 0.871 [0.227, 3.642] | 0.037 [0.001, 2.133] | 0.174 [0.001, 0.68]  | 6.412 [0.001, 14.195] | 0.028 [0.001, 0.651] |
| EW | 2.753 [1.347, 4.383] | 0.111 [0.001, 1.627] | 0.030 [0.001, 0.484] | 0.022 [0.001, 0.466]  | 0.033 [0.001, 0.504] |

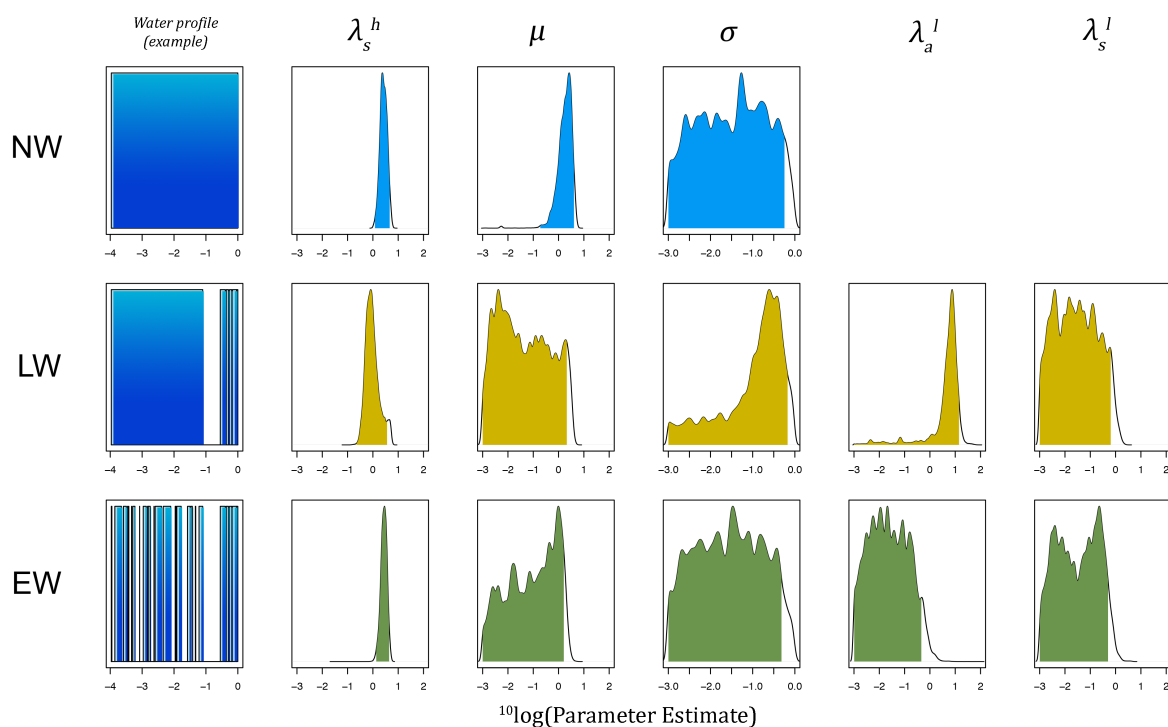

Figure 3. Posterior densities of the pooled posterior distribution across 100 randomly drawn trees from the posterior MCMC chain. Shown are estimates for the three water level scenarios (no water level changes (NW), literature values for water level changes (LW) and extrapolated values for water level changes (EW)). Shown are the posterior density (black line) and the 95% credibility interval (shaded area, blue for NW, gold for LW and green for EW). X-axes are on a  $^{10}\log$  scale. The first column shows a sample water level profile, with the water level on the y-axis, and the time before present (in million years) on the x-axis. Note that for the EW model, for each simulation a new profile was generated, and that the shown profile is only one example of such a profile. Because without water level changes,  $\lambda_a^l$  and  $\lambda_s^l$  have no meaning, their posterior distribution is not shown for the NW scenario.

## 492 Model fitting

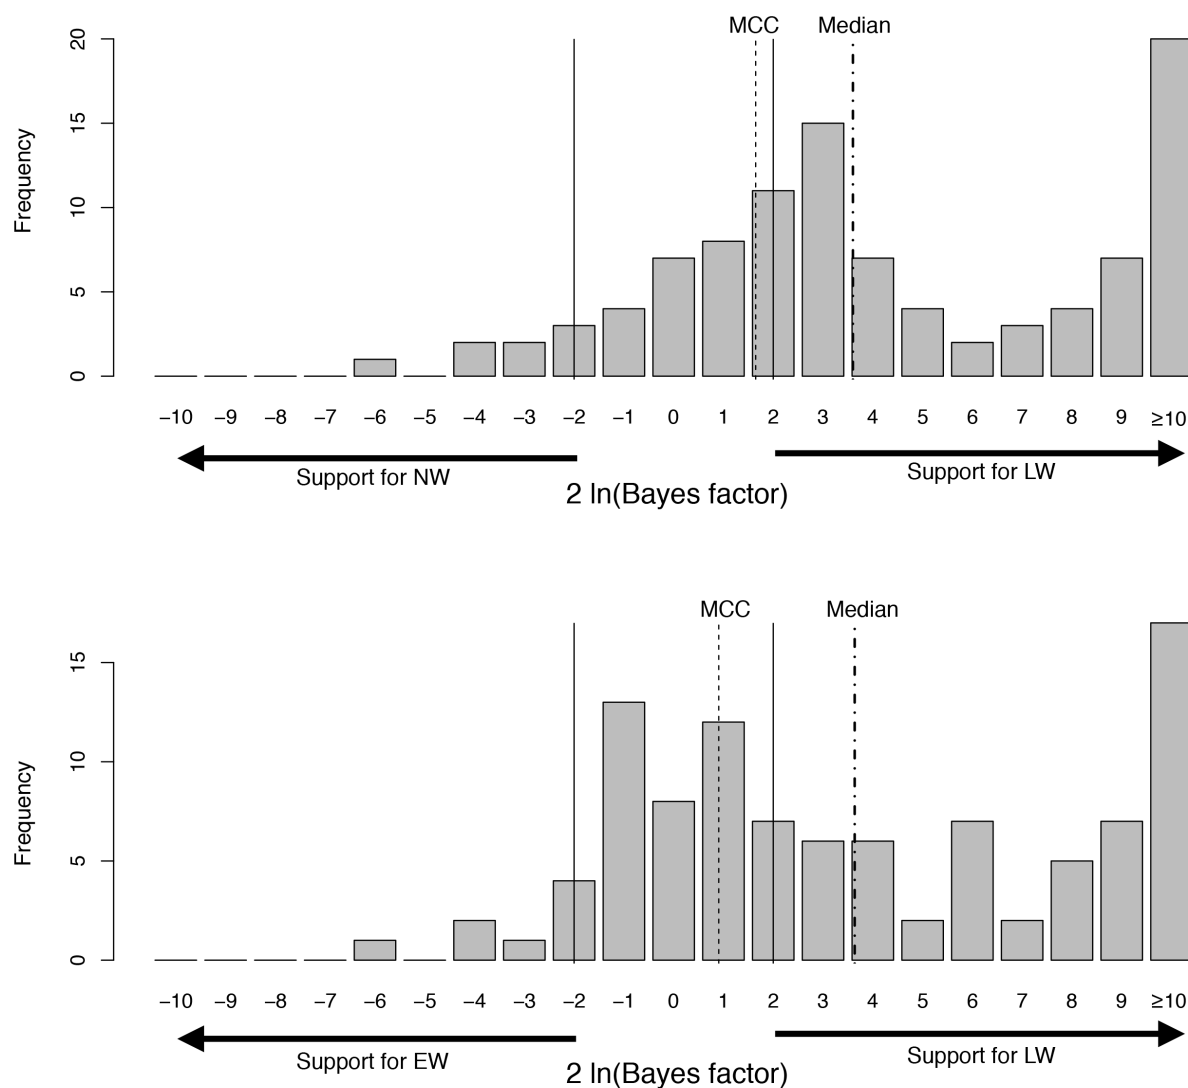

493

494 Figure 4. Model selection results on 100 trees randomly drawn from the \*BEAST posterior of  
 495 the *Lamprologini* tree. The top row shows  $2 \ln(\text{Bayes factors})$  comparing posterior support  
 496 of the LW (literature water changes) model with the NW (no water level changes) model, the  
 497 bottom row shows  $2 \ln(\text{Bayes factors})$  of the comparison between the posterior support for  
 498 the LW model with the EW (extrapolated water level changes) model. A  $2 \ln(\text{Bayes factor})$   
 499 higher than 2 is generally considered to provide substantial evidence in favor of the  
 500 respective model (Kass and Raftery 1995), which is indicated by the solid lines. The thin  
 501 dotted line indicates the median  $2 \ln(\text{Bayes factor})$  obtained for the MCC tree, for which we  
 502 do not find substantial support for any of the three models. The thick dotted line indicates the  
 503 median  $2 \ln(\text{Bayes factor})$  for the trees drawn from the \*BEAST posterior (e.g. the median of  
 504 the distribution shown), which is in both cases above 2, indicating substantial support for the  
 505 LW model compared to the other two models.  $2 \ln(\text{Bayes factors})$  higher than 10 are grouped  
 506 together into one category.

507

508

509

# 510    *Model selection*

511    When we apply the model selection algorithm to the MCC tree, we find median Bayes factors  
512    (we report here not the raw numbers, but  $2 \ln(\text{Bayes factor})$ , but for brevity refer to them as  
513    Bayes factors) of 1.64 and 0.9 when comparing the LW model with the NW and EW model  
514    respectively. We thus find no convincing evidence for any of the three models, when fitting  
515    our model to the MCC tree. Alternatively, when we fit to 100 trees randomly sampled from  
516    the \*BEAST posterior, we find Bayes factors of 3.60 and 3.65 when comparing LW model  
517    with the NW and EW model respectively. Furthermore, in 77 out of the 100 trees we select  
518    the LW model as the most likely model (based on the Bayes factor), in 17 out of 100 trees we  
519    select the EW model, and only in 6 out of 100 trees we select the model without any water  
520    level changes.

521

522



# 523 Validation of the model selection procedure

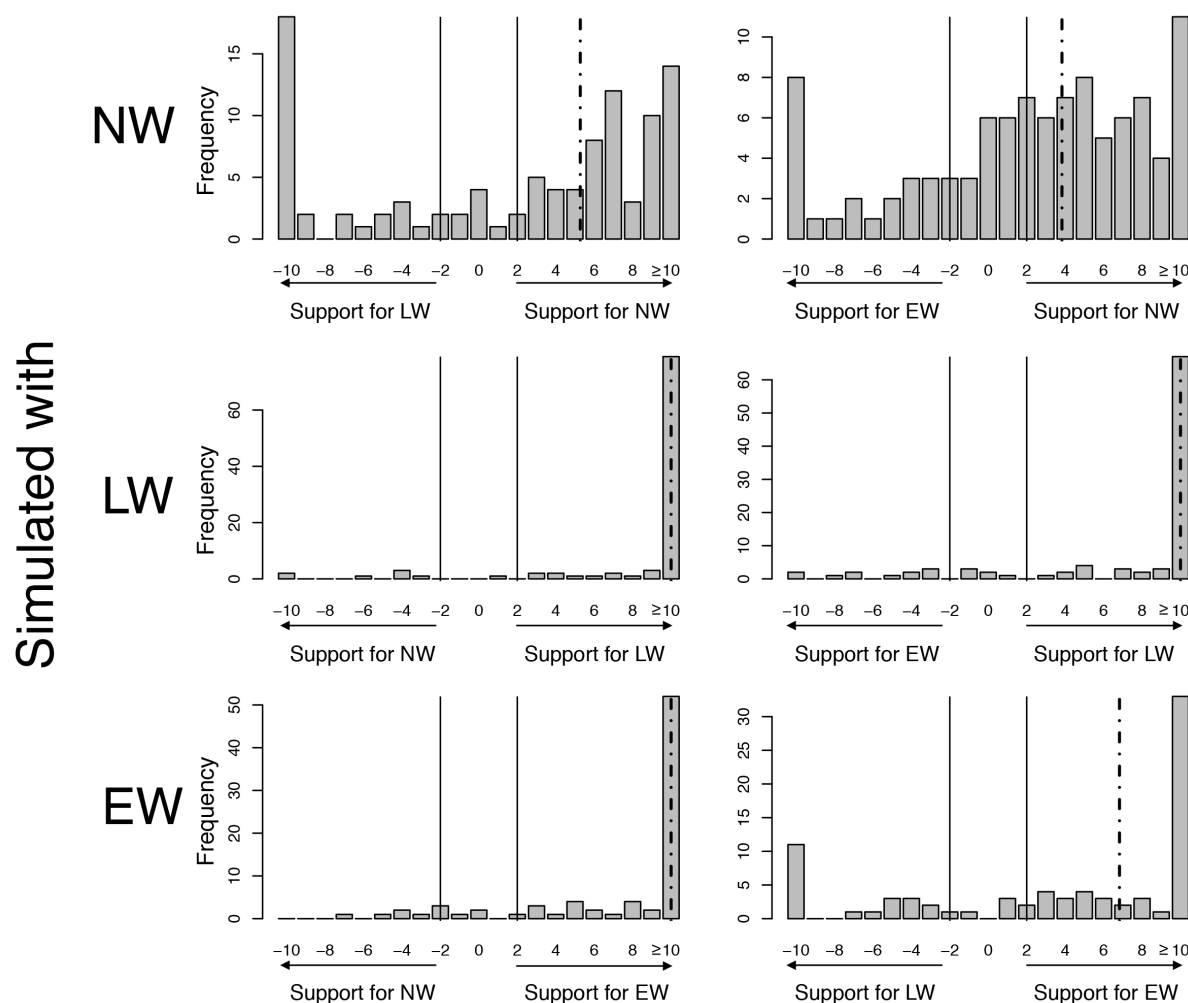

524  
525 Figure 5. Validation of the ability of our ABC-SMC algorithm to infer the correct model. 100  
526 replicate datasets were generated for each water level model (no water level changes NW,  
527 water level changes from the literature LW, or water level changes extrapolated beyond the  
528 literature range, EW). The plots show the distribution of the 2 ln(Bayes factor) across all 100  
529 replicate inferences. The dotted line indicates the median 2 ln(Bayes factor). A 2ln(Bayes  
530 factor) higher than 2 is generally considered to provide substantial evidence in favor of the  
531 respective model (Kass and Raftery 1995). 2 ln(Bayes factors) higher than 10 are grouped  
532 together into one category.

533

534 Model validation shows that when we simulated data using the NW model, the NW model  
535 was selected using our model validation algorithm more than the other two models (59 out of  
536 100 replicates). Median Bayes factors are both higher than 2, with a median of 5.28 and 3.83  
537 versus the LW and EW model respectively, supporting considerable support for the NW

model over the other two models. When data was simulated with the LW model, we selected the correct model in the majority of 100 replicates (84 out of 100 replicates). The Bayes factors reflect this, with medians of 18.4 (this is the maximum score) versus both the NW and EW model. Lastly, when we simulated data using the EW model, we selected the correct model more than the other two models, in 65 out of 100 replicates. This was reflected by the Bayes factors as well, as the median Bayes factor versus the NW model was 18.4, and the median Bayes factor versus the LW model was 7.47.

More interesting is the correct detection rate of a model, which is given by the number of trees simulated by the model that is selected for that tree. This is equal to asking whether, given posterior support for a respective model, we also find that the tree for which we find this support was simulated with the respective model. If our model selection procedure can not detect models accurately, we expect a detection rate of around 50%, as support is always divided between two (not three) models. Detection rates larger than 50% support the conclusion that our model selection procedure can adequately infer the correct model.

We find that across the 300 simulated trees, 120 trees received considerable support for the LW model over the NW model (e.g.  $2 \ln (\text{BF LW/NW}) > 2$ ), of these 120 trees, 92 trees were simulated with the LW model, which leads to a correct detection rate of 77% (See Figure 6). Furthermore, out of 107 trees that received considerable support for the LW model over the EW model, we find that 83 trees were simulated using the LW model, which translates to a detection rate of 78%. We find similar detection rates for the NW model: 90% against the LW model (62 out of 69 detected trees) and 83% against the EW model (54 out of 65 detected trees). Lastly, detection rates for the EW model mirror these findings: a detection rate of 79% against the NW model (79 out of 100 detected trees), and of 86% against the LW model (68 out of 79 detected trees).

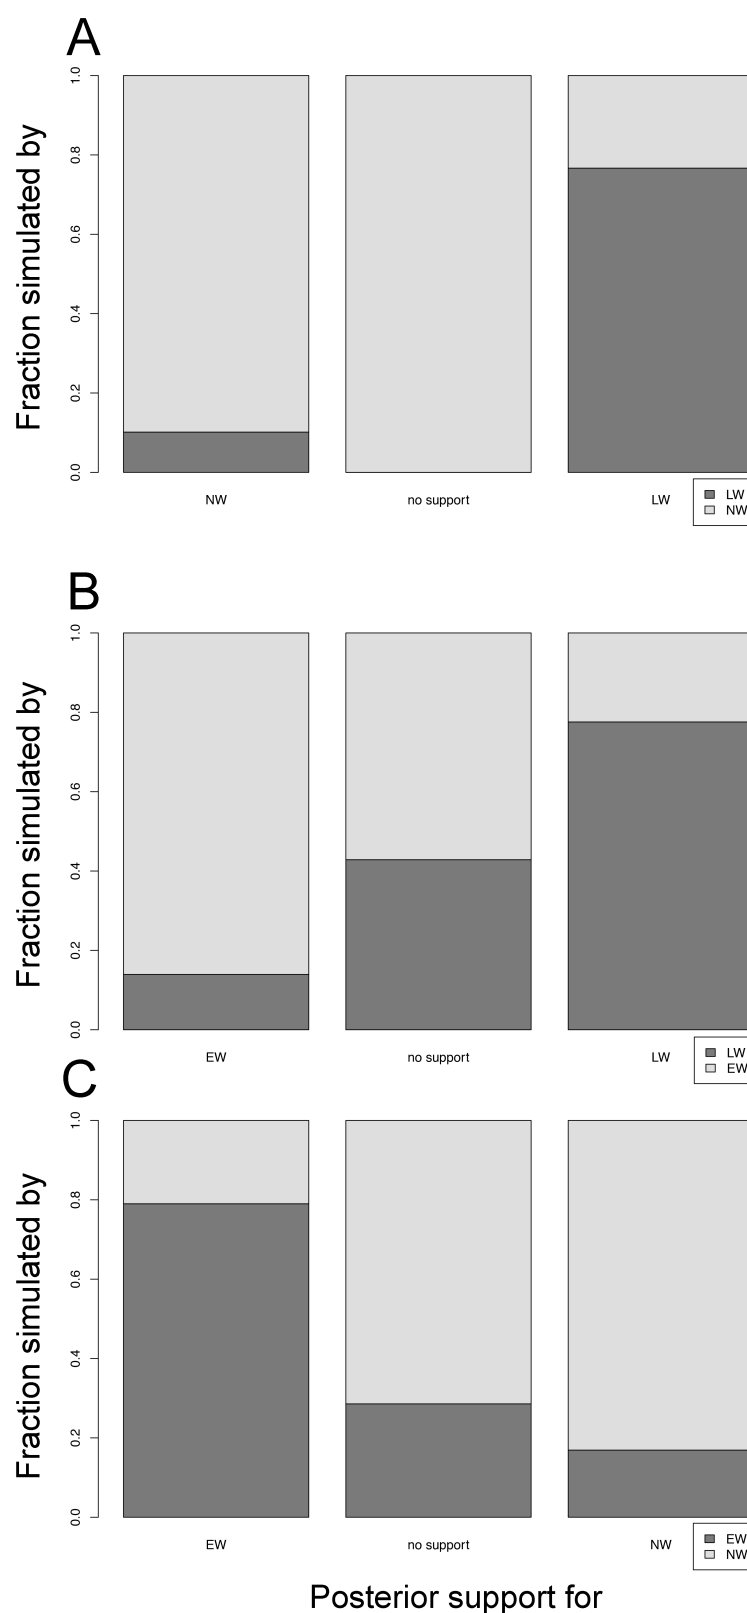

563

564 Figure 6. Accuracy of assignment of models depending on their posterior support. **A:** The  
565 relative fraction of trees simulated with either LW (dark) or NW (light), receiving support for  
566 LW ( $2\ln(\text{Bayes Factor LW/NW}) > 2$ ), support for NW ( $2\ln(\text{Bayes Factor LW/NW}) < -2$ ), or  
567 receiving no support for either model. **B:** The relative fraction of trees simulated with either

568 LW (dark) or EW (light), receiving support for LW ( $2\ln(\text{Bayes Factor LW/EW}) > 2$ ), support  
 569 for EW ( $2\ln(\text{Bayes Factor LW/EW}) < -2$ ), or receiving no support for either model. **C:** The  
 570 relative fraction of trees simulated with either NW (dark) or EW (light), receiving support for  
 571 NW ( $2\ln(\text{Bayes Factor NW/EW}) > 2$ ), support for EW ( $2\ln(\text{Bayes Factor NW/EW}) < -2$ ), or  
 572 receiving no support for either model.

573

## 574 DISCUSSION

575 We have presented a model that infers past speciation and extinction rates, and their  
 576 interactions with changes in the environment, from a given phylogeny. We have shown that  
 577 our model is able to accurately select between different scenarios, including or excluding  
 578 environmental change. We applied our model to an updated phylogeny of the cichlid fish  
 579 tribe of *Lamprologini* and found evidence that past water level changes have shaped current  
 580 cichlid diversity in Lake Tanganyika, when we applied our model to a sample from the  
 581 posterior distribution of trees of the *Lamprologini*, as inferred by \*BEAST. We asked the  
 582 model to select the best fitting of three scenarios: a scenario without any water level changes,  
 583 a scenario using the values found in the literature, and a scenario using the mean rate of water  
 584 level change found in the literature to extrapolate water level changes beyond the range of  
 585 literature values available. We found that the model following literature water levels received  
 586 most support, which suggests that water level changes have been an important driver of  
 587 diversity in the *Lamprologini*. We note that a model without effect of water level changes on  
 588 diversification (NW) can sometimes generate patterns that resemble the predictions of the  
 589 preferred model (LW). Yet, we find when fitting our model to trees drawn from the \*BEAST  
 590 posterior that the distribution of Bayes Factors is skewed towards the model following  
 591 literature water levels (LW) and we find support for the model without an effect of water  
 592 level changes on diversification (NW) only for a small number of trees, suggesting that this  
 593 effect is relatively small.

594

595 When we applied our model selection algorithm on the Most Credible Consensus (MCC)  
 596 tree, we found contrasting results. Support for both models including water level changes  
 597 diminished, and posterior support for the model without any water level changes increased.

Nevertheless, no single model could yield enough support to convincingly reject the other two. Moreover, results using the MCC tree are markedly different from those using trees sampled from the posterior. We conclude therefore that the MCC tree, at least for the *Lamprologini*, but most likely more generally, provides a poor summary of the true species tree and of the underlying variation in branching patterns. Hence, we suggest to avoid reporting MCC trees, and instead to provide the reader with the full posterior distribution, for instance through a DensiTree plot (Bouckaert and Heled 2014). Posterior inference, for instance of speciation and extinction rates should preferentially also be performed on multiple independent samples from the posterior, rather than on the MCC tree, as the underlying variation might lead to very different results, as we have shown here.

Discrepancies between the MCC tree and the posterior distribution of trees could also potentially clarify previously recovered inconsistencies when studying diversification, for example in shrews in the Philippines. The Philippines have been subject to strong sea level fluctuations, causing the fission and fusion of several islands, primarily during the Pleistocene (Brown et al. 2013). Population genetic evidence has convincingly shown that the location of such fused islands correlates strongly with genetic divergence between populations in many different species (Evans et al. 2003; Linkem et al. 2010; Siler et al. 2010; Oaks et al. 2013). Phylogenetic analysis however, has failed to show any evidence of diversification associated with Pleistocene water level changes (Esselstyn and Brown 2009). The basis for this phylogenetic analysis however, was an MCC tree. Repeating the analysis on the posterior distribution underlying the MCC tree could mitigate these problems, and could clarify the impact of Pleistocene water level changes on diversification in the Philippines archipelago.

622

623 When allopatric speciation rates are high, the resulting phylogenetic trees have internal nodes  
 624 that have synchronized branching times, e.g. branching times that align with episodes of  
 625 water level change. Although Phylogenetic reconstruction software is able to infer  
 626 simultaneous branching events, it typically uses only two parameters (birth and death) to infer  
 627 all branching events of the tree. Therefore, if it can accommodate the simultaneous events, it  
 628 is unlikely to fit well to the non-simultaneous events, and vice-versa. Our finding of evidence  
 629 for a substantial role of habitat dynamics in diversification can therefore be regarded as  
 630 conservative. To improve the fit of trees generated by our model with trees generated by  
 631 \*BEAST we included an *a posteriori* perturbation parameter in our model. This parameter  
 632 determines the standard deviation of a Gaussian perturbation kernel that is applied to each  
 633 node after the simulation has completed. By perturbing each node, we minimized the  
 634 probability that branching times align in time. We found that standard deviation increased in  
 635 size with an increase in allopatric speciation, as expected. A less *ad hoc* solution to deal with  
 636 the alignment of branching times in the tree would be to incorporate the model presented here  
 637 as a tree prior in phylogenetic reconstruction software. Although this need not introduce any  
 638 significant differences in the tree topology, the distribution of branching times could be  
 639 substantially influenced, and any subsequent inference focusing on such patterns could be  
 640 very different. Including such models in tree reconstruction software may require  
 641 incorporation of ABC methods, and will be extremely computationally demanding, but our  
 642 results justify such an endeavor.

643

644 Given that water level changes are only prevalent during the last million years before present,  
 645 we cannot exclude the possibility that increased diversification due to reasons other than

changing water levels has driven diversification during this period. On average, the LW model could be represented by a simple birth-death model with a rate shift around one million years ago. We expect however that although such a model could accommodate the increased average diversification, it cannot replicate temporal alignment in branching events due to water level changes. To examine this in more detail, we fitted a simple birth-death model with a rate shift around one million years ago to the trees obtained from the posterior (see Supplementary Information).. In the absence of a likelihood for the LW model, we compared the nLTT statistic for the rate-shift model with that of the LW model, as the nLTT statistic should be sensitive to detecting temporal alignment of branching events, We find that our model is much closer to the empirical data than the rate shift model. We attempted to improve the fit of the rate-shift model by allowing the speciation rate in the model to shift up and down in line with the literature values of the water level changes. The two rates inferred by the model then represent speciation at low, and at high water level respectively. Although we do find an increase in the rate of speciation at low water level, the fit of this rate-shift model is still worse than that of the LW model. This supports our conclusion that water level changes influence the phylogeny not only through an increased speciation rate, but also through temporal alignment of branching times.

Although we refer in our model to the different implementations of speciation as sympatric and allopatric, care should be taken in interpreting these forms of speciation. We consider here allopatric speciation only on a large scale, where populations become allopatric over stretches of hundreds of kilometers (Sturmbauer et al. 2001). Large-scale isolation might not be necessary for cichlids, as some species can already be limited in gene flow by a sand stretch of 50 meters separating populations (Rico and Turner 2002). Such micro-allopatric speciation events are not captured by the allopatric speciation rate in our model. Rather, these



local scale events are captured in our model by sympatric speciation. Hence, sympatric speciation in our model covers all degrees of speciation ranging from full sympatry to allopatry, providing that geographical isolation is smaller than that imposed by a water level change. Allopatric speciation in our model then solely refers to speciation events caused by geographical isolation over a large distance, driven by changes in water level, and inducing simultaneous branching events.

In our model we have assumed that when the water level drops, species distribute themselves equally over the two pockets of water that survive the water level drop. A more realistic model would allow for a skew towards one of the pockets, either dependent on the respective sizes of the pockets, the distribution of the species over the lake at high water level, or both. We have here refrained from including a parameter that regulates the distribution of species over the two pockets in order to avoid over fitting. Another possible extension of our model would lie into extending the approach towards three or more pockets, possibly combined with a parameter governing the distribution of species across these three pockets during a water level drop. Bathymetric maps of Lake Tanganyika suggest that for some water level changes it might split into three lakes (Coulter 1991). How a split of a species into three populations, and associated allopatric divergence and speciation, affects phylogenetic structure and affects temporal alignment in branching times remains currently unexplored and would be an interesting avenue for future work.

Our results are strongly in line with population genomic analyses in a number of cichlid species including *Eretmodus cyanostictus* (Verheyen et al. 1996), *Tropheus moorii* (Koblmüller et al. 2011; Nevado et al. 2013; Sefc et al. 2017), *Variabilichromis moorii*

(Nevado et al. 2013), *Altolamprologus* (Koblmüller et al. 2016) and *Telmatochromis temporalis* (Winkelmann et al. 2016), and resonate with population genomic findings across the three African Rift Lakes (Sturmbauer et al. 2001). Furthermore, population genetic studies have shown that water level fluctuations in Lake Malawi have been associated with population expansion in cichlid species (Arnegard et al. 1999; Sturmbauer et al. 2001; Genner et al. 2010), suggesting a potential role for water level changes in Lake Malawi as well. Phylogenetic reconstruction for Malawi cichlid species is problematic however, partially due to the young age of the species. However, considering that the geological record of Lake Malawi spans a much larger part of the total lifespan of the lake (Delvaux 1995; Lyons et al. 2015; Ivory et al. 2016) and thus provides a much better record about water level fluctuations since the colonization of the lake by cichlids, we expect that modern genetic developments will soon allow for a thorough understanding of the impact of water level changes on cichlids in Lake Malawi as well.

## Conclusion

Our model integrates standard constant-rate birth-death mechanics with environmental change and with speciation induced by geographical isolation. We analyzed the phylogeny of the tribe of *Lamprologini* to see whether past water level changes in Lake Tanganyika have contributed to the current diversity of cichlid fish in Lake Tanganyika. We find an important role for environmental changes in driving diversity, and find evidence that past water level changes have shaped current standing diversity in the tribe of *Lamprologini*. However, we found that inference of past environmental changes from a single phylogeny, and more specifically, from the MCC tree, tends to lead to unreliable results. We therefore advocate caution when using the MCC tree as a basis for further analysis. Furthermore, we argue for

the inclusion of more detailed branching models in phylogenetic reconstruction software,  
which allow for the inclusion of an interaction between the environment, and speciation rates.

## Acknowledgements

We thank Lucas Molleman for useful discussions. We thank the Netherlands Organisation for Scientific Research (NWO) for financial support through VIDI and VICI grants awarded to RSE. We thank the Donald Smits Center for information Technology of the University of Groningen for their support and providing access to the Millipede and Peregrine high-performance computing cluster. We thank the Max Planck Institute for Evolutionary Theory for their support and providing access to their high-performance computing cluster. We thank the Carl von Ossietzky Universität Oldenburg for their support and providing access to the CARL computing cluster.

## 732 REFERENCES

- 733 Aguilée R., Claessen D., Lambert A. 2013. Adaptive radiation driven by the interplay of eco-  
734 evolutionary and landscape dynamics. *Evolution* (N. Y). 67:1291–1306.
- 735 Aguilée R., Lambert A., Claessen D. 2011. Ecological speciation in dynamic landscapes. *J.*  
736 *Evol. Biol.* 24:2663–77.
- 737 Alin S., Cohen A., Bills R. 1999. Effects of landscape disturbance on animal communities in  
738 Lake Tanganyika, East Africa. *Conservation*. 13:1017–1033.
- 739 Alin S., Cohen A.S. 2003. Lake-level history of Lake Tanganyika, East Africa, for the past  
740 2500 years based on ostracode-inferred water-depth reconstruction. *Palaeogeogr.*  
741 *Palaeoclimatol. Palaeoecol.* 199:31–49.
- 742 Arnegard M.E., Markert J.A., Danley P.D., Stauffer J.R., Ambali A.J., Kocher T.D. 1999.  
743 Population structure and colour variation of the cichlid fishes *Labeotropheus fuelleborni*  
744 *Ahl* along a recently formed archipelago of rocky habitat patches in southern Lake  
745 Malawi. *Proc. R. Soc. Lond. B.* 266:119–130.
- 746 Barnosky A. 2005. Effects of Quaternary climatic change on speciation in mammals. *J.*  
747 *Mamm. Evol.* 12:247–264.
- 748 Bouckaert R., Heled J. 2014. DensiTree 2: Seeing trees through the forest. *bioRxiv*:1–11.
- 749 Bouckaert R., Heled J., Kühnert D., Vaughan T., Wu C.H., Xie D., Suchard M.A., Rambaut  
750 A., Drummond A.J. 2014. BEAST 2: A Software Platform for Bayesian Evolutionary  
751 Analysis. *PLoS Comput. Biol.* 10:1–6.
- 752 Brawand D., Wagner C.E., Li Y.I., Malinsky M., Keller I., Fan S., Simakov O., Ng A.Y.,  
753 Lim Z.W., Bezault E., Turner-Maier, J. Johnson J., Alcazar R., Noh H.J., Russell P.,  
754 Aken B., Alföldi J., Amemiya C., Azzouzi N., Baroiller J.-F., Barloy-Hubler F., Berlin  
755 A., Bloomquist R., Carleton K.L., Conte M.A., D’Cotta H., Eshel O., Gaffney L.,  
756 Galibert F., Gante H.F., Gnerre S., Greuter L., Guyon R., Haddad N.S., Haerty W.,  
757 Harris R.M., Hofmann H. a., Hourlier T., Hulata G., Jaffe D.B., Lara M., A.P. L.,  
758 MacCallum I., Mwaiko S., Nikaido M., Nishihara H., Ozouf-Costaz C., Penman D.J.,  
759 Przybylski D., Rakotomanga M., Renn S.C.P., Ribeiro F.J., Ron M., Salzburger W.,  
760 Sanchez-Pulido L., Santos M.E., Searle S., Sharpe T., Swofford R., Tan F.J., Williams  
761 L., Young S., Yin S., Okada N., Kocher T.D., Miska E. a., Lander E.S., Venkatesh B.,  
762 Fernald R.D., Meyer A., Ponting C.P., Streelman J.T., Lindblad-Toh K., Seehausen O.,  
763 Di Palma F. 2014. The genomic substrate for adaptive radiation in African cichlid fish.  
764 *Nature*. 513:375–381.
- 765 Breman F.C., Loix S., Jordaens K., Snoeks J., Van Steenberge M. 2016. Testing the potential  
766 of DNA barcoding in vertebrate radiations: the case of the littoral cichlids (Pisces,  
767 Perciformes, Cichlidae) from Lake Tanganyika. *Mol. Ecol. Resour.* 16:1455–1464.
- 768 Brown R.M., Siler C.D., Oliveros C.H., Esselstyn J. a., Diesmos A.C., Hosner P. a., Linkem  
769 C.W., Barley A.J., Oaks J.R., Sanguila M.B., Welton L.J., Blackburn D.C., Moyle R.G.,  
770 Townsend Peterson a., Alcala A.C. 2013. Evolutionary processes of diversification in a  
771 model island archipelago. *Annu. Rev. Ecol. Evol. Syst.* 44:411–435.

772 Capella-Gutiérrez S., Silla-Martínez J.M., Gabaldón T. 2009. trimAl: A tool for automated  
773 alignment trimming in large-scale phylogenetic analyses. *Bioinformatics*. 25:1972–  
774 1973.

775 Clabaut C., Salzburger W., Meyer A. 2005. Comparative phylogenetic analyses of the  
776 adaptive radiation of Lake Tanganyika cichlid fish: nuclear sequences are less  
777 homoplasious but also less informative than mitochondrial DNA. *J. Mol. Evol.* 61:666–  
778 81.

779 Cohen A.S., Lezzar K.E., Tiercelin J.J., Soreghan M. 1997a. New palaeogeographic and lake-  
780 level reconstructions of Lake Tanganyika: implications for tectonic, climatic and  
781 biological evolution in a rift lake. *Basin Res.* 9:107–132.

782 Cohen A.S., Soreghan M., Scholz C.A. 1993. Estimating the age of formation of lakes: an  
783 example from Lake Tanganyika, East African Rift system. *Geology*. 21:511.

784 Cohen A.S., Stone J.R., Beuning K.R.M., Park L.E., Reinthal P.N., Dettman D., Scholz C.A.,  
785 Johnson T.C., King J.W., Talbot M.R., Brown E.T., Ivory S.J. 2007. Ecological  
786 consequences of early Late Pleistocene megadroughts in tropical Africa. *Proc. Natl.*  
787 *Acad. Sci.* 104:16422–7.

788 Cohen A.S., Talbot M.R., Awramik S.M., Dettman D.L., Abell P. 1997b. Lake level and  
789 paleoenvironmental history of Lake Tanganyika, Africa, as inferred from late Holocene  
790 and modern stromatolites. *Geol. Soc. Am. Bull.* 109:444–460.

791 Coulter G. 1991. *Lake Tanganyika and its life*. Oxford University Press.

792 Coyne J., Orr H. 2004. *Speciation*. Sunderland, Massachusetts U.S.A.: Sinauer Associates.

793 Day J.J., Santini S., Garcia-Moreno J. 2007. Phylogenetic relationships of the Lake  
794 Tanganyika cichlid tribe Lamprologini: the story from mitochondrial DNA. *Mol.*  
795 *Phylogenet. Evol.* 45:629–42.

796 Delvaux D. 1995. Age of Lake Malawi (Nyasa) and water level fluctuations. *Mus. roy. Afr.*  
797 *centr., Tervuren (Belg.), Dept. Geol. Min., Rapp. ann.* 1993 1994. 108:99–108.

798 Duftner N., Koblmüller S., Sturmbauer C. 2005. Evolutionary relationships of the  
799 Limnchromini, a tribe of benthic deepwater cichlid fish endemic to Lake Tanganyika,  
800 East Africa. *J. Mol. Evol.* 60:277–289.

801 Esselstyn J.A., Brown R.M. 2009. The role of repeated sea-level fluctuations in the  
802 generation of shrew (Soricidae: Crocidura) diversity in the Philippine Archipelago. *Mol.*  
803 *Phylogenet. Evol.* 53:171–181.

804 Etienne R.S., Haegeman B., Stadler T., Aze T., Pearson P.N., Purvis A., Phillimore A.B.  
805 2012. Diversity-dependence brings molecular phylogenies closer to agreement with the  
806 fossil record. *Proc. R. Soc. B Biol. Sci.* 279:1300–1309.

807 Etienne R.S., Rosindell J. 2012. Prolonging the past counteracts the pull of the present:  
808 protracted speciation can explain observed slowdowns in diversification. *Syst. Biol.*  
809 61:204–13.

810 Evans B.J., Brown R.M., McGuire J.A., Supriatna J., Andayani N., Diesmos A., Iskandar D.,  
811 Melnick D.J., Cannatella D.C. 2003. Phylogenetics of fanged frogs: testing

- 812 biogeographical hypotheses at the interface of the asian and Australian faunal zones.  
813 Syst. Biol. 52:794–819.
- 814 Gante H.F., Matschiner M., Malmstrøm M., Jakobsen K.S., Jentoft S., Salzburger W. 2016.  
815 Genomics of speciation and introgression in Princess cichlid fishes from Lake  
816 Tanganyika. Mol. Ecol.
- 817 Genner M.J., Knight M.E., Haesler M.P., Turner G.F. 2010. Establishment and expansion of  
818 Lake Malawi rock fish populations after a dramatic Late Pleistocene lake level rise. Mol.  
819 Ecol. 19:170–82.
- 820 Genner M.J., Seehausen O., Lunt D.H., Joyce D.A., Shaw P.W., Carvalho G.R., Turner G.F.  
821 2007. Age of cichlids: new dates for ancient lake fish radiations. Mol. Biol. Evol.  
822 24:1269–82.
- 823 Glor R.E., Gifford M.E., Larson A., Losos J.B., Schettino L.R., Chamizo Lara A.R., Jackman  
824 T.R. 2004. Partial island submergence and speciation in an adaptive radiation: a  
825 multilocus analysis of the Cuban green anoles. Proc. R. Soc. B Biol. Sci. 271:2257–65.
- 826 Heaney L.R. 1985. Zoogeographic Evidence for Middle and Late Pleistocene Land Bridges  
827 to the Philippine Islands. Mod. Quat. Res. Southeast Asia. 9:127–143.
- 828 Heled J., Drummond A.J. 2010. Bayesian Inference of Species Trees from Multilocus Data.  
829 Mol. Biol. Evol. 27:570–580.
- 830 Hutter C.R., Guayasamin J.M., Wiens J.J. 2013. Explaining Andean megadiversity: The  
831 evolutionary and ecological causes of glassfrog elevational richness patterns. Ecol. Lett.  
832 16:1135–1144.
- 833 Ivory S.J., Blome M.W., King J.W., McGlue M.M., Cole J.E., Cohen A.S. 2016.  
834 Environmental change explains cichlid adaptive radiation at Lake Malawi over the past  
835 1.2 million years. Proc. Natl. Acad. Sci.:201611028.
- 836 Janzen T., Höhna S., Etienne R.S.R.S. 2015. Approximate Bayesian Computation of  
837 diversification rates from molecular phylogenies: introducing a new efficient summary  
838 statistic, the nLTT. Methods Ecol. Evol. 6:566–575.
- 839 Kass R., Raftery A. 1995. Bayes Factors. J. Amer. Stat. Assoc. 90:773–795.
- 840 Katoh K., Standley D.M. 2013. MAFFT multiple sequence alignment software version 7:  
841 Improvements in performance and usability. Mol. Biol. Evol. 30:772–780.
- 842 Klett V., Meyer A. 2002. What, if anything, is a Tilapia?-mitochondrial ND2 phylogeny of  
843 tilapiines and the evolution of parental care systems in the African cichlid fishes. Mol.  
844 Biol. Evol. 19:865–883.
- 845 Koblmüller S., Duftner N., Sefc K.M., Aibara M., Stipacek M., Blanc M., Egger B.,  
846 Sturmbauer C. 2007. Reticulate phylogeny of gastropod-shell-breeding cichlids from  
847 Lake Tanganyika--the result of repeated introgressive hybridization. BMC Evol. Biol.  
848 7:7.
- 849 Koblmüller S., Nevado B., Makasa L., van Steenberge M., Vanhove M.P.M., Verheyen E.,  
850 Sturmbauer C., Sefc K.M. 2016. Phylogeny and phylogeography of *Altolamprologus*:  
851 ancient introgression and recent divergence in a rock-dwelling Lake Tanganyika cichlid

852 genus. *Hydrobiologia*.:1–16.

853 Koblmüller S., Salzburger W., Obermüller B., Eigner E., Sturmbauer C., Sefc K.M. 2011.  
854 Separated by sand, fused by dropping water: habitat barriers and fluctuating water levels  
855 steer the evolution of rock-dwelling cichlid populations in Lake Tanganyika. *Mol. Ecol.*  
856 20:2272–90.

857 Kocher T.D., Conroy J. a, McKaye K.R., Stauffer J.R., Lockwood S.F. 1995. Evolution of  
858 NADH dehydrogenase subunit 2 in east African cichlid fish. *Mol. Phylogenet. Evol.*  
859 4:420–432.

860 Kraaijeveld K., Kraaijeveld-Smit F.J.L., Maan M.E. 2011. Sexual selection and speciation:  
861 the comparative evidence revisited. *Biol. Rev. Camb. Philos. Soc.* 86:367–77.

862 Kullander S.O., Karlsson M., Norén M. 2014a. *Chalinochromis cyanophleps*, a new species  
863 of cichlid fish (Teleostei: Cichlidae) from Lake Tanganyika. *Zootaxa*. 3790:425–438.

864 Kullander S.O., Norén M., Karlsson M., Karlsson M. 2014b. Description of *Neolamprologus*  
865 *timidus*, new species, and review of *N. furcifer* from Lake Tanganyika (Teleostei:  
866 Cichlidae). *Ichthyol.Explor.Freshwaters*. 24:301–328.

867 Lanfear R., Calcott B., Ho S.Y.W., Guindon S. 2012. PartitionFinder: Combined selection of  
868 partitioning schemes and substitution models for phylogenetic analyses. *Mol. Biol. Evol.*  
869 29:1695–1701.

870 Lanfear R., Frandsen P.B., Wright A.M., Senfeld T., Calcott B. 2016. PartitionFinder 2: New  
871 Methods for Selecting Partitioned Models of Evolution for Molecular and  
872 Morphological Phylogenetic Analyses. *Mol. Biol. Evol.*:msw260.

873 Lezzar K.E., Tiercelin J.J., Batist M., Cohen A.S., Bandora T., Rensbergen P., Turdu C.,  
874 Mifundu W., Klerkx J. 1996. New seismic stratigraphy and Late Tertiary history of the  
875 North Tanganyika Basin, East African Rift system, deduced from multichannel and  
876 high-resolution reflection seismic data and piston core evidence. *Basin Res.* 8:1–28.

877 Linkem C.W., Hesed K.M., Diesmos A.C., Brown R.M. 2010. Species boundaries and  
878 cryptic lineage diversity in a Philippine forest skink complex (Reptilia; Squamata;  
879 Scincidae: Lygosominae). *Mol. Phylogenet. Evol.* 56:572–585.

880 Lyons R.P., Scholz C.A., Cohen A.S., King J.W., Brown E.T., Ivory S.J., Johnson T.C.,  
881 Deino A.L., Reinthal P.N., Mcglue M.M., Blome M.W. 2015. Continuous 1.3-million-  
882 year record of East African hydroclimate, and implications for patterns of evolution and  
883 biodiversity. *PNAS*.:2–7.

884 Matschiner M., Hanel R., Salzburger W. 2011. On the origin and trigger of the notothenioid  
885 adaptive radiation. *PLoS One*. 6.

886 Matschiner M., Musilová Z., Barth J.M.I., Starostova Z., Salzburger W., Steel M., Bouckaert  
887 R. 2016. Bayesian Phylogenetic Estimation of Clade Ages Supports Trans-Atlantic  
888 Dispersal of Cichlid Fishes. *Syst. Biol.*

889 McGlue M.M., Lezzar K.E., Cohen A.S., Russell J.M., Tiercelin J.-J., Felton A. a., Mbede E.,  
890 Nkotagu H.H. 2008. Seismic records of late Pleistocene aridity in Lake Tanganyika,  
891 tropical East Africa. *J. Paleolimnol.* 40:635–653.



- 892 Meyer B.S., Matschiner M., Salzburger W. 2015. A tribal level phylogeny of Lake  
893 Tanganyika cichlid fishes based on a genomic multi-marker approach. *Mol. Phylogenet.*  
894 *Evol.* 83:56–71.
- 895 Meyer B.S., Matschiner M., Salzburger W. 2016. Disentangling incomplete lineage sorting  
896 and introgression to refine species-tree estimates for Lake Tanganyika cichlid fishes.  
897 *Syst. Biol.* syw069:1–20.
- 898 Muschick M., Indermaur A., Salzburger W. 2012. Convergent Evolution within an Adaptive  
899 Radiation of Cichlid Fishes. *Curr. Biol.*:1–7.
- 900 Nagai H., Terai Y., Sugawara T., Imai H., Nishihara H., Hori M., Okada N. 2011. Reverse  
901 evolution in RH1 for adaptation of cichlids to water depth in Lake Tanganyika. *Mol.*  
902 *Biol. Evol.* 28:1769–1776.
- 903 Nee S., May R.M., Harvey P.H. 1994. The reconstructed evolutionary process. *Philos. Trans.*  
904 *R. Soc. Lond. B. Biol. Sci.* 344:305–11.
- 905 Nevado B., Koblmüller S., Sturmbauer C., Snoeks J., Usano-Alemany J., Verheyen E. 2009.  
906 Complete mitochondrial DNA replacement in a Lake Tanganyika cichlid fish. *Mol.*  
907 *Ecol.* 18:4240–4255.
- 908 Nevado B., Mautner S., Sturmbauer C., Verheyen E. 2013. Water-level fluctuations and  
909 metapopulation dynamics as drivers of genetic diversity in populations of three  
910 Tanganyikan cichlid fish species. *Mol. Ecol.* 22:3933–48.
- 911 O’Quin K.E., Hofmann C.M., Hofmann H.A., Carleton K.L. 2010. Parallel Evolution of  
912 opsin gene expression in African cichlid fishes. *Mol. Biol. Evol.* 27:2839–2854.
- 913 Oaks J.R., Sukumaran J., Esselstyn J. a, Linkem C.W., Siler C.D., Holder M.T., Brown R.M.  
914 2013. Evidence for climate-driven diversification? A caution for interpreting ABC  
915 inferences of simultaneous historical events. *Evolution (N. Y.)*. 67:991–1010.
- 916 Papadopoulou A., Knowles L.L. 2015. Genomic tests of the species-pump hypothesis: Recent  
917 island connectivity cycles drive population divergence but not speciation in Caribbean  
918 crickets across the Virgin Islands. *Evolution (N. Y.)*. 69:1501–1517.
- 919 Pearse W.D., Purvis A. 2013. phyloGenerator: An automated phylogeny generation tool for  
920 ecologists. *Methods Ecol. Evol.* 4:692–698.
- 921 Pybus O., Harvey P. 2000. Testing macro–evolutionary models using incomplete molecular  
922 phylogenies. *Proc. R. Soc. B Biol. Sci.* 267:2267–72.
- 923 Rico C., Turner G.F. 2002. Extreme microallopatric divergence in a cichlid species from  
924 Lake Malawi. *Mol. Ecol.* 11:1585–90.
- 925 Rossiter A. 1995. The cichlid fish assemblages of Lake Tanganyika: ecology, behaviour and  
926 evolution of its species flocks. *Adv. Ecol. Res.*
- 927 Salzburger W., Baric S., Sturmbauer C. 2002. Speciation via introgressive hybridization in  
928 East African cichlids? *Mol. Ecol.* 11:619–25.
- 929 Santos M.E., Braasch I., Boileau N., Meyer B.S., Sauter L., Böhne A., Belting H.-G.,  
930 Affolter M., Salzburger W. 2014. The evolution of cichlid fish egg-spots is linked with a



- 931 cis-regulatory change. *Nat. Commun.* 5:5149.
- 932 Schelly R., Salzburger W., Koblmüller S., Duftner N., Sturmbauer C. 2006. Phylogenetic  
933 relationships of the lamprologine cichlid genus *Lepidolamprologus* (Teleostei:  
934 Perciformes) based on mitochondrial and nuclear sequences, suggesting introgressive  
935 hybridization. *Mol. Phylogenet. Evol.* 38:426–438.
- 936 Schelly R., Takahashi T., Bills R., Hori M. 2007. The first case of aggressive mimicry among  
937 lamprologines in a new species of *Lepidolamprologus* (Perciformes: Cichlidae) from  
938 Lake Tanganyika. *Zootaxa.* 49:39–49.
- 939 Schwarzer J., Misof B., Tautz D., Schlieven U.K. 2009. The root of the East African cichlid  
940 radiations. *BMC Evol. Biol.* 9:186.
- 941 Schweiger O., Klotz S., Durka W., Kühn I. 2008. A comparative test of phylogenetic  
942 diversity indices. *Oecologia.* 157:485–95.
- 943 Sedano R.E., Burns K.J. 2010. Are the Northern Andes a species pump for Neotropical birds?  
944 Phylogenetics and biogeography of a clade of Neotropical tanagers (Aves: Thraupini). *J.*  
945 *Biogeogr.* 37:325–343.
- 946 Seehausen O. 2000. Explosive speciation rates and unusual species richness in  
947 haplochromine cichlid fishes: effects of sexual selection. *Adv. Ecol. Res.* 31:237–274.
- 948 Seehausen O. 2006. African cichlid fish: a model system in adaptive radiation research. *Proc.*  
949 *R. Soc. B Biol. Sci.* 273:1987–98.
- 950 Sefc K.M., Mattersdorfer K., Ziegelbecker A., Neuhüttler N., Steiner O., Goessler W.,  
951 Koblmüller S. 2017. Shifting barriers and phenotypic diversification by hybridisation.  
952 *Ecol. Lett.*
- 953 Shirai K., Inomata N., Mizoiri S., Aibara M., Terai Y., Okada N., Tachida H. 2014. High  
954 prevalence of non-synonymous substitutions in mtDNA of cichlid fishes from Lake  
955 Victoria. *Gene.* 552:239–245.
- 956 Siler C.D., Oaks J.R., Esselstyn J.A., Diesmos A.C., Brown R.M. 2010. Phylogeny and  
957 biogeography of Philippine bent-toed geckos (Gekkonidae: *Cyrtodactylus*) contradict a  
958 prevailing model of Pleistocene diversification. *Mol. Phylogenet. Evol.* 55:699–710.
- 959 Spady T.C., Seehausen O., Loew E.R., Jordan R.C., Kocher T.D., Carleton K.L. 2005.  
960 Adaptive molecular evolution in the opsin genes of rapidly speciating cichlid species.  
961 *Mol. Biol. Evol.* 22:1412–1422.
- 962 Sparks J.S., Smith W.L.W.L. 2004. Phylogeny and biogeography of cichlid fishes (Teleostei:  
963 Perciformes: Cichlidae). *Cladistics.* 20:501–517.
- 964 Sturmbauer C., Baric S., Salzburger W., Rüber L., Verheyen E. 2001. Lake level fluctuations  
965 synchronize genetic divergences of cichlid fishes in African lakes. *Mol. Biol. Evol.*  
966 18:144–54.
- 967 Sturmbauer C., Salzburger W., Duftner N., Schelly R., Koblmüller S. 2010. Evolutionary  
968 history of the Lake Tanganyika cichlid tribe Lamprologini (Teleostei: Perciformes)  
969 derived from mitochondrial and nuclear DNA data. *Mol. Phylogenet. Evol.* 57:266–84.

- Sugawara T., Terai Y., Okada N. 2002. Natural Selection of the Rhodopsin Gene During the Adaptive Radiation of East African Great Lakes Cichlid Fishes. *Mol. Biol. Evol.* 19:1807–1811.
- Thorpe R.S., Surget-Groba Y., Johansson H. 2008. The relative importance of ecology and geographic isolation for speciation in anoles. *Philos. Trans. R. Soc. Lond. B. Biol. Sci.* 363:3071–81.
- Toni T., Stumpf M.P.H. 2010. Simulation-based model selection for dynamical systems in systems and population biology. *Bioinformatics.* 26:104–110.
- Toni T., Welch D., Strelkowa N., Ipsen A., Stumpf M.P.H. 2009. Approximate Bayesian computation scheme for parameter inference and model selection in dynamical systems. *J. R. Soc. Interface.* 6:187–202.
- Turner G.F., Seehausen O., Knight M.E., Allender C.J., Robinson R. 2001. How many species of cichlid fishes are there in African lakes? *Mol. Ecol.* 10:793–806.
- Vaidya G., Lohman D.J., Meier R. 2011. SequenceMatrix: Concatenation software for the fast assembly of multi-gene datasets with character set and codon information. *Cladistics.* 27:171–180.
- Verheyen E., Rüber L., Snoeks J., Meyer A. 1996. Mitochondrial phylogeography of rock-dwelling cichlid fishes reveals evolutionary influence of historical lake level fluctuations of Lake Tanganyika, Africa. *Philos. Trans. R. Soc. Lond. B. Biol. Sci.* 351:797–805.
- Wagner C.E., Harmon L.J., Seehausen O. 2012. Ecological opportunity and sexual selection together predict adaptive radiation. *Nature.* 487:366–9.
- Wagner C.E., Harmon L.J., Seehausen O. 2014. Cichlid species-area relationships are shaped by adaptive radiations that scale with area. *Ecol. Lett.* 17:583–592.
- Wagner C.E., McIntyre P.B., Buels K.S., Gilbert D.M., Michel E. 2009. Diet predicts intestine length in Lake Tanganyika’s cichlid fishes. *Funct. Ecol.* 23:1122–1131.
- Weir J.T. 2006. Divergent Timing and Patterns of Species Accumulation in Lowland and Highland Neotropical Birds. *Evolution (N. Y.)*. 60:842–855.
- Weiss J.D., Cotterill F.P.D., Schliwen U.K. 2015. Lake Tanganyika — A ‘ Melting Pot ’ of Ancient and Young Cichlid Lineages ( Teleostei : Cichlidae )? :1–29.
- Winkelmann K., Rüber L., Genner M.J. 2016. Lake level fluctuations and divergence of cichlid fish ecomorphs in Lake Tanganyika. *Hydrobiologia.*:1–14.
